# Supplementary material for: Testing the impact of local alcohol licencing policies on reported crime rates in England
Source: PubMed Central journal article supplement (PMC5284476; doi:10.1136/jech-2016-207753), 2016-08-11
Supplement: jech-2016-207753supp_material.pdf [file jech-2016-207753supp_material.pdf]

## **Testing the impact of local alcohol licensing policies on reported crime rates in England**

De Vocht F<sup>1,2</sup>, Heron J<sup>1,2</sup>, Campbell R<sup>1,2</sup>, Egan M<sup>1,3</sup>, Mooney J<sup>4</sup>, Angus C<sup>1,5</sup>, Brennan A<sup>1,5</sup>,  
Hickman M<sup>1,2</sup>.

<sup>1</sup> NIHR School for Public Health Research (SPHR)

<sup>2</sup> School of Social and Community Medicine, University of Bristol, Bristol, UK

<sup>3</sup> Department of Health Services Research and Policy, London School of Hygiene and  
Tropical Medicine, London, UK

<sup>4</sup> Health Sciences and Well-being Research Group, University of Sunderland, Sunderland,  
UK

<sup>5</sup> ScHARR, School of Health and Related Research, University of Sheffield, Sheffield, UK

### **Online Supplementary Material**

**Disclaimer** The views expressed are those of the author(s) and not necessarily those of the NHS, the NIHR or the Department of Health.

**Funding** This work was funded by the National Institute for Health Research School for Public Health Research (NIHR SPHR). NIHR SPHR is a partnership between the Universities of Sheffield, Bristol, Cambridge, Exeter, UCL; The London School for Hygiene and Tropical Medicine; the LiLaC collaboration between the Universities of Liverpool and Lancaster and Fuse; and The Centre for Translational Research in Public Health, a collaboration between Newcastle, Durham, Northumbria, Sunderland and Teesside Universities.

**Licence for Publication:** The Corresponding Author has the right to grant on behalf of all authors and does grant on behalf of all authors, an exclusive licence (or non exclusive for government employees) on a worldwide basis to the BMJ Publishing Group Ltd to permit this article (if accepted) to be published in JECH and any other BMJPGGL products and sublicences such use and exploit all subsidiary rights, as set out in our licence (<http://group.bmj.com/products/journals/instructions-for-authors/licence-forms>).

**Table. Growth models. 2009-2014 *a priori* selected outcomes related to “alcohol crime environments”.**

| Parameter                                       | shoplifting<br>(SE)              |                                 | Possession of a weapon<br>(SE)   |                                 | Drug offenses<br>(SE)            |                                 | Domestic burglary<br>(SE)        |                                 |
|-------------------------------------------------|----------------------------------|---------------------------------|----------------------------------|---------------------------------|----------------------------------|---------------------------------|----------------------------------|---------------------------------|
|                                                 | Linear trend                     | Quadratic trend                 | Linear trend                     | Quadratic trend                 | Quadratic trend                  | Quadratic trend                 | Linear trend                     | Quadratic trend                 |
| Baseline (year 2009)                            | -0.786 (0.162)<br>P<0.001        |                                 | -0.401 (0.152)<br>P<0.001        |                                 | 0.556 (0.157)<br>P<0.001         |                                 | 0.982 (0.164)<br>P<0.001         |                                 |
| Trend (2009-2014)                               | -0.142 (0.027)<br>P<0.001        | 0.008 (0.002)<br>P<0.001        | -0.526 (0.045)<br>P<0.001        | 0.042 (0.004)<br>P<0.001        | -0.044 (0.035)<br>P=0.246        | 0.008 (0.003)<br>P=0.010        | 0.002 (0.034)<br>P=0.872         | -0.009 (0.003)<br>P=0.002       |
| <b>Effect on intercept</b>                      |                                  |                                 |                                  |                                 |                                  |                                 |                                  |                                 |
| No policy                                       | ref                              |                                 | ref                              |                                 | ref                              |                                 | ref                              |                                 |
| Low policy                                      | -0.073 (0.109)                   |                                 | -0.171 (0.103)                   |                                 | -0.165 (0.106)                   |                                 | <b>-0.245 (0.111)</b>            |                                 |
| Medium                                          | <b>0.148 (0.088)</b>             |                                 | 0.025 (0.083)                    |                                 | 0.020 (0.085)                    |                                 | 0.115 (0.090)                    |                                 |
| High policy                                     | <b>0.375 (0.117)</b><br>P=0.004  |                                 | <b>0.570 (0.110)</b><br>P<0.001  |                                 | <b>0.528 (0.113)</b><br>P<0.001  |                                 | <b>0.434 (0.119)</b><br>P<0.001  |                                 |
| Deprivation at baseline                         | 3.278 (0.638)<br>P<0.001         |                                 | 5.832 (0.599)<br>P<0.001         |                                 | 5.739 (0.616)<br>P<0.001         |                                 | -4.961 (0.646)<br>P<0.001        |                                 |
| Population at baseline                          | -0.20 (0.038)<br>P<0.001         |                                 | -0.298 (0.036)<br>P<0.001        |                                 | -0.171 (0.037)<br>P<0.001        |                                 | -0.175 (0.038)<br>P<0.001        |                                 |
| Outlet density at baseline                      | 0.002 (0.002)<br>P=0.285         |                                 | 0.001 (0.001)<br>P=0.715         |                                 | 0.010 (0.002)<br>P<0.001         |                                 | 0.000 (0.002)<br>P=0.799         |                                 |
| Alcohol-related hospital admissions at baseline | -0.000 (0.001)<br>P=0.895        |                                 | -0.004 (0.001)<br>P=0.001        |                                 | -0.006 (0.001)<br>P<0.001        |                                 | -0.002 (0.001)<br>P=0.119        |                                 |
| <b>Effects on slope</b>                         |                                  |                                 |                                  |                                 |                                  |                                 |                                  |                                 |
| No policy                                       | ref                              | ref                             | ref                              | ref                             | ref                              | ref                             | ref                              | ref                             |
| Low policy                                      | <b>0.062 (0.018)</b>             | <b>-0.006 (0.002)</b>           | <b>0.104 (0.030)</b>             | <b>-0.105 (0.003)</b>           | <b>0.087 (0.023)</b>             | <b>-0.008 (0.002)</b>           | <b>0.095 (0.023)</b>             | <b>-0.008 (0.002)</b>           |
| Medium                                          | -0.011 (0.015)                   | 0.001 (0.001)                   | 0.027 (0.024)                    | -0.003 (0.002)                  | 0.019 (0.019)                    | -0.002 (0.002)                  | 0.003 (0.019)                    | -0.000 (0.002)                  |
| High policy                                     | <b>-0.079 (0.020)</b><br>P<0.001 | <b>0.007 (0.002)</b><br>P<0.001 | <b>-0.166 (0.032)</b><br>P<0.001 | <b>0.014 (0.003)</b><br>P<0.001 | <b>-0.094 (0.025)</b><br>P<0.001 | <b>0.008 (0.002)</b><br>P<0.001 | <b>-0.083 (0.025)</b><br>P<0.001 | <b>0.007 (0.002)</b><br>P<0.001 |
| Deprivation                                     | -0.700 (0.106)<br>P<0.001        | 0.069 (0.009)<br>P<0.001        | -0.773 (0.175)<br>P<0.001        | 0.080 (0.017)<br>P<0.001        | -1.066 (0.136)<br>P<0.001        | 0.092 (0.012)<br>P<0.001        | -0.682 (0.135)<br>P<0.001        | 0.054 (0.012)<br>P<0.001        |
| Population at baseline                          | 0.071 (0.006)<br>P<0.001         | -0.006 (0.001)<br>P<0.001       | 0.112 (0.010)<br>P<0.001         | -0.011 (0.001)<br>P<0.001       | 0.076 (0.008)<br>P<0.001         | -0.008 (0.001)<br>P<0.001       | 0.118 (0.008)<br>P<0.001         | -0.012 (0.001)<br>P<0.001       |
| Outlet density at baseline                      | 0.001 (0.000)<br>P<0.001         | -0.000 (0.000)<br>P<0.001       | 0.001 (0.000)<br>P=0.003         | -0.000 (0.000)<br>P=0.003       | -0.001 (0.000)<br>P=0.002        | 0.000 (0.000)<br>P=0.042        | 0.001 (0.000)<br>P=0.002         | -0.000 (0.000)<br>P=0.002       |
| Alcohol-related hospital admissions at baseline | 0.000 (0.000)<br>P=0.049         | -0.000 (0.000)<br>P=0.797       | 0.001 (0.000)<br>P<0.001         | -0.000 (0.000)<br>P<0.001       | 0.002 (0.000)<br>P<0.001         | -0.000 (0.000)<br>P<0.001       | -0.001 (0.000)<br>P<0.001        | 0.000 (0.000)<br>P<0.001        |

| <b>Variance estimates</b> | <b>estimates</b> | <b>estimates</b> | <b>estimates</b> | <b>estimates</b> |
|---------------------------|------------------|------------------|------------------|------------------|
| Intercept                 | 0.317            | 0.194            | 0.271            | 0.305            |
| Slope                     | 0.002            | 0.003            | 0.004            | 0.004            |
| covariance                | -0.63            | -0.63            | -0.75            | -0.66            |
| Residual                  | 0.013            | 0.041            | 0.021            | 0.021            |
| BIC                       | -7,264           | -127             | -4,272           | -4,274           |
| Explained variance        | 95.9%            | 89.0%            | 93.6%            | 94.5%            |
